# Supplementary material
Source: PubMed Central journal article supplement (PMC2726361)
Supplement: 0903682106_0903682106SI.pdf [file 0903682106_0903682106SI.pdf]

# Supporting Information

O’Gorman and Emmerson 10.1073/pnas.0903682106

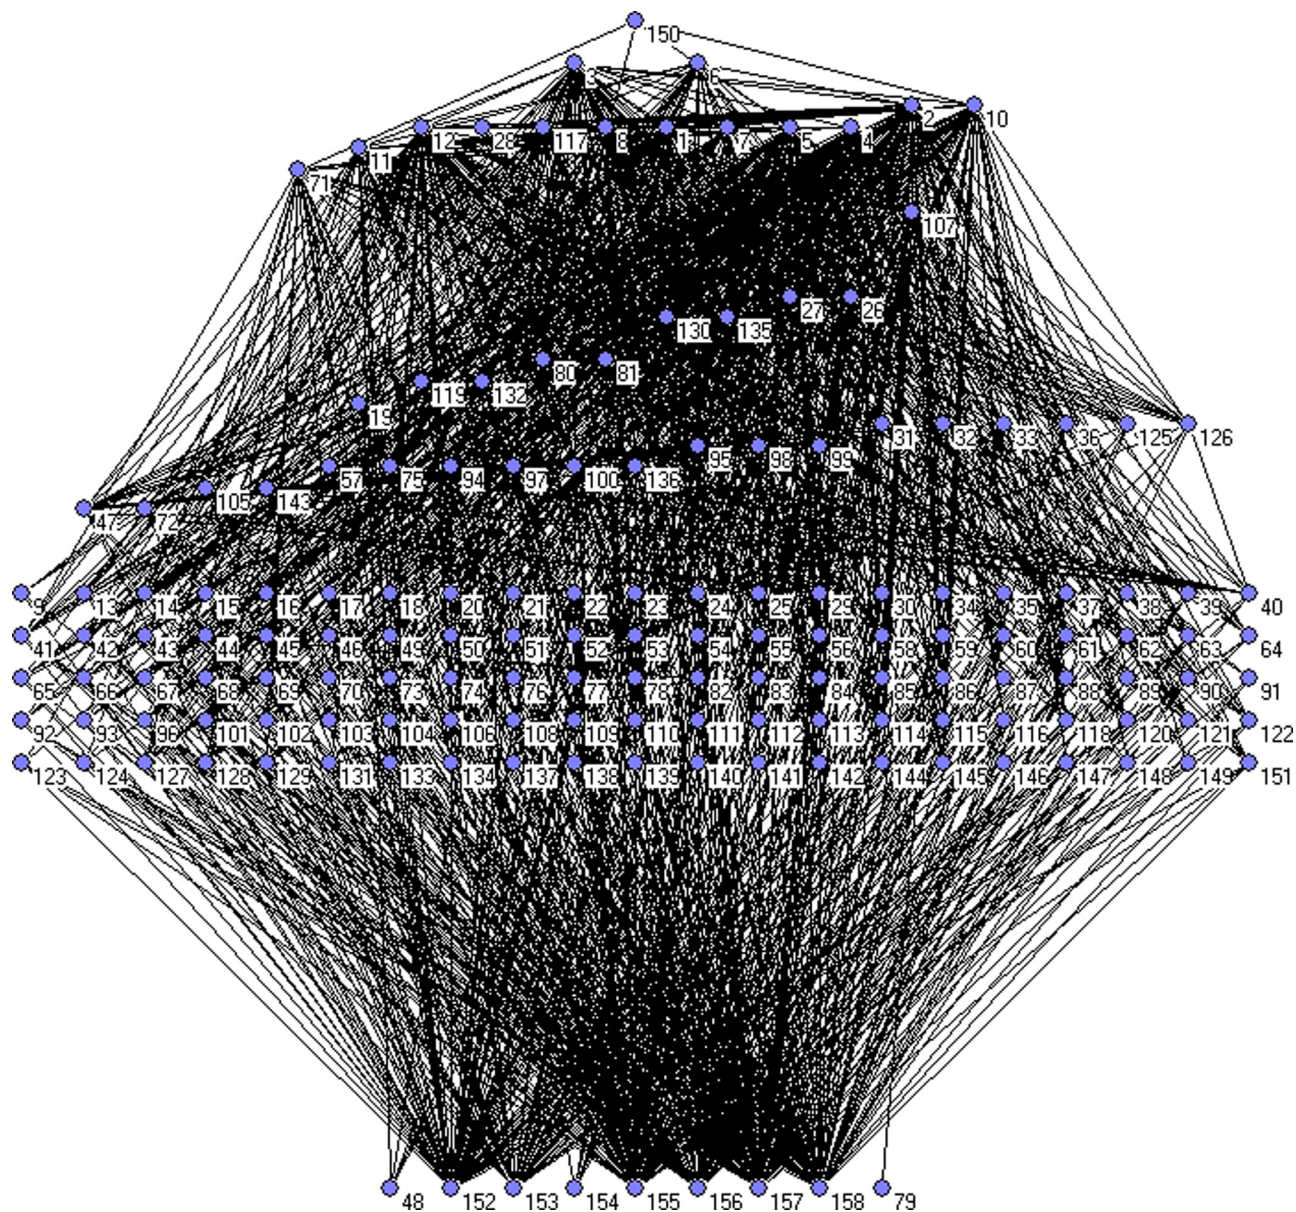

**Fig. S1.** Core web of species interactions over all of the experimental mesocosms. We calculated trophic height (TH) as the average trophic position of a species in all food chains of which it is a part. The 9 basal resources at the foot of the web have TH = 1. The 5 long parallel rows have TH = 2. All other taxa are arranged in the vertical plane according to their TH. A list of the taxa that correspond to each number in the web (along with their linkage density and TH) can be found in [Table S1](#). Note that species 150 at the top of the web is a parasitic gastropod (feeding on brittle stars). Taxa 48 and 79 at the foot of the web are nonfeeding larvae.

Table S1. Key to the taxa in the mesocosm food web shown in Fig. S1

| Code | Taxa                               | Common name          | LD  | TH   |
|------|------------------------------------|----------------------|-----|------|
| 1    | <i>Carcinus maenas</i>             | Common shore crab    | 55  | 3.09 |
| 2    | <i>Ctenolabrus rupestris</i>       | Goldsinny wrasse     | 85  | 3.16 |
| 3    | <i>Gaidropsarus mediterraneus</i>  | Shore rockling       | 65  | 3.24 |
| 4    | <i>Gobius niger</i>                | Black goby           | 96  | 3.14 |
| 5    | <i>Gobius paganellus</i>           | Rock goby            | 105 | 3.14 |
| 6    | <i>Marthasterias glacialis</i>     | Spiny starfish       | 52  | 3.26 |
| 7    | <i>Necora puber</i>                | Velvet swimming crab | 31  | 3.13 |
| 8    | <i>Palaemon serratus</i>           | Common prawn         | 33  | 3.09 |
| 9    | <i>Paracentrotus lividus</i>       | Purple sea urchin    | 46  | 2    |
| 10   | <i>Taurulus bubalis</i>            | Sea scorpion         | 5   | 3.16 |
| 11   | <i>Gobiusculus flavescens</i>      | Two-spot goby        | 80  | 3.05 |
| 12   | <i>Pomatoschistus pictus</i>       | Painted goby         | 67  | 3.08 |
| 13   | <i>Abra alba</i>                   | White furrow shell   | 10  | 2    |
| 14   | <i>Acanthocardia echinata</i>      | Prickly cockle       | 12  | 2    |
| 15   | <i>Acanthochitona crinitus</i>     | (chiton)             | 5   | 2    |
| 16   | <i>Aequipecten opercularis</i>     | Queen scallop        | 9   | 2    |
| 17   | <i>Alvania beani</i>               | (gastropod)          | 14  | 2    |
| 18   | <i>Alvania semistriata</i>         | (gastropod)          | 14  | 2    |
| 19   | <i>Amphilocheus manudens</i>       | (amphipod)           | 8   | 2.46 |
| 20   | <i>Anomia ephippium</i>            | Saddle oyster        | 15  | 2    |
| 21   | <i>Aora gracilis</i>               | (amphipod)           | 10  | 2    |
| 22   | <i>Apherusa bispinosa</i>          | (amphipod)           | 5   | 2    |
| 23   | <i>Apseudes latreillei</i>         | (tanaid)             | 6   | 2    |
| 24   | <i>Apseudes talpa</i>              | (tanaid)             | 6   | 2    |
| 25   | <i>Ascidella aspersa</i>           | Dirty sea squirt     | 6   | 2    |
| 26   | <i>Asterina phylactica</i>         | (starfish)           | 13  | 2.71 |
| 27   | <i>Bittium reticulatum</i>         | Needle whelk         | 22  | 2.69 |
| 28   | <i>Buccinum undatum</i>            | Common whelk         | 14  | 3.08 |
| 29   | Calanoida                          | (copepod)            | 24  | 2    |
| 30   | <i>Callopora lineata</i>           | (bryozoan)           | 5   | 2    |
| 31   | <i>Caprella acanthifera</i>        | (caprellid)          | 12  | 2.40 |
| 32   | <i>Caprella equilibra</i>          | (caprellid)          | 12  | 2.40 |
| 33   | <i>Caprella linearis</i>           | (caprellid)          | 12  | 2.40 |
| 34   | <i>Ceradocus semiserratus</i>      | (amphipod)           | 6   | 2    |
| 35   | <i>Cerastoderma edule</i>          | Common cockle        | 7   | 2    |
| 36   | <i>Cerithiopsis tubercularis</i>   | (gastropod)          | 13  | 2.40 |
| 37   | <i>Chironomidae spp.</i>           | (chironomid)         | 7   | 2    |
| 38   | <i>Chlamys varia</i>               | Variiegated scallop  | 9   | 2    |
| 39   | <i>Circulus striatus</i>           | (gastropod)          | 10  | 2    |
| 40   | <i>Clathrina coriacea</i>          | (sponge)             | 15  | 2    |
| 41   | <i>Coriandria fulgida</i>          | (gastropod)          | 15  | 2    |
| 42   | <i>Crassicorophium bonnellii</i>   | (gastropod)          | 12  | 2    |
| 43   | <i>Crassicorophium crassicorne</i> | (gastropod)          | 12  | 2    |
| 44   | <i>Crisia denticulata</i>          | (bryozoan)           | 11  | 2    |
| 45   | Cumacea A                          | (cumacean)           | 11  | 2    |
| 46   | <i>Cuthona sp.</i>                 | (gastropod)          | 5   | 2    |
| 47   | Cyclopoida                         | (copepod)            | 22  | 2.20 |
| 48   | Cyprid larvae                      | (cyprid)             | 5   | 1    |
| 49   | <i>Cythere lutea</i>               | (ostracod)           | 11  | 2    |
| 50   | <i>Dexamine spinosa</i>            | (amphipod)           | 9   | 2    |
| 51   | <i>Dexamine thea</i>               | (amphipod)           | 9   | 2    |
| 52   | <i>Disporella hispida</i>          | (bryozoan)           | 5   | 2    |
| 53   | <i>Dysidea fragilis</i>            | (sponge)             | 15  | 2    |
| 54   | <i>Elasmopus rapax</i>             | (amphipod)           | 8   | 2    |
| 55   | <i>Electra pilosa</i>              | Hairy sea mat        | 7   | 2    |
| 56   | <i>Elysia viridis</i>              | Green elysia         | 6   | 2    |
| 57   | <i>Emarginula fissura</i>          | (gastropod)          | 8   | 2.33 |
| 58   | <i>Epilepton clarkiae</i>          | (bivalve)            | 10  | 2    |
| 59   | <i>Epitonium clathrus</i>          | Common wentletrap    | 6   | 2    |
| 60   | <i>Erichthonius brasiliensis</i>   | (amphipod)           | 12  | 2    |
| 61   | <i>Erichthonius punctatus</i>      | (amphipod)           | 12  | 2    |
| 62   | <i>Eubranchus farrani</i>          | (gastropod)          | 5   | 2    |
| 63   | <i>Exogone gemmifera</i>           | (polychaete)         | 6   | 2    |
| 64   | Foraminifera A                     | (foraminiferan)      | 10  | 2    |

| Code | Taxa                             | Common name           | LD | TH   |
|------|----------------------------------|-----------------------|----|------|
| 65   | <i>Foraminifera B</i>            | (foraminiferan)       | 10 | 2    |
| 66   | <i>Foraminifera C</i>            | (foraminiferan)       | 10 | 2    |
| 67   | <i>Foraminifera D</i>            | (foraminiferan)       | 10 | 2    |
| 68   | <i>Foraminifera E</i>            | (foraminiferan)       | 10 | 2    |
| 69   | <i>Foraminifera F</i>            | (foraminiferan)       | 10 | 2    |
| 70   | <i>Foraminifera G</i>            | (foraminiferan)       | 10 | 2    |
| 71   | <i>Galathea squamifera</i>       | Black squat lobster   | 26 | 3.02 |
| 72   | <i>Gammaropsis maculata</i>      | (amphipod)            | 8  | 2.20 |
| 73   | <i>Gammarus locusta</i>          | (amphipod)            | 8  | 2    |
| 74   | <i>Gammarus zaddachi</i>         | (amphipod)            | 8  | 2    |
| 75   | <i>Gibbula umbilicalis</i>       | Flat top shell        | 9  | 2.33 |
| 76   | <i>Halacarellus basteri</i>      | (sea mite)            | 3  | 2    |
| 77   | Harpacticoida                    | (copepod)             | 24 | 2    |
| 78   | <i>Hiatella arctica</i>          | Wrinkled rock borer   | 15 | 2    |
| 79   | Hymenopteran larvae              | (hymenopteran)        | 1  | 1    |
| 80   | <i>Iothia fulva</i>              | (gastropod)           | 11 | 2.57 |
| 81   | <i>Idotea A</i>                  | (isopod)              | 11 | 2.57 |
| 82   | <i>Idotea B</i>                  | (isopod)              | 4  | 2    |
| 83   | <i>Janua pagenstecheri</i>       | (spirorbid)           | 10 | 2    |
| 84   | <i>Lasaea rubra</i>              | (bivalve)             | 11 | 2    |
| 85   | <i>Lembos websteri</i>           | (amphipod)            | 11 | 2    |
| 86   | <i>Leptocheirus tricristatus</i> | (amphipod)            | 11 | 2    |
| 87   | <i>Leptochelia savignyi</i>      | (tanaid)              | 7  | 2    |
| 88   | <i>Leptocythere pellucida</i>    | (ostracod)            | 11 | 2    |
| 89   | <i>Leptomysis lingvura</i>       | (mysid)               | 6  | 2    |
| 90   | <i>Loxococoncha rhomboidea</i>   | (ostracod)            | 11 | 2    |
| 91   | <i>Lysianassa ceratina</i>       | (amphipod)            | 5  | 2    |
| 92   | <i>Melita palmata</i>            | (amphipod)            | 8  | 2    |
| 93   | <i>Microdeutopus anomalus</i>    | (amphipod)            | 9  | 2    |
| 94   | <i>Microprotopus maculatus</i>   | (amphipod)            | 6  | 2.33 |
| 95   | <i>Modiolula phaseolina</i>      | Bean horse mussel     | 22 | 2.36 |
| 96   | <i>Monia patelliformis</i>       | Ribbed saddle oyster  | 14 | 2    |
| 97   | <i>Munna kroyeri</i>             | (isopod)              | 10 | 2.33 |
| 98   | <i>Musculus discors</i>          | Green crenella        | 22 | 2.36 |
| 99   | <i>Mytilus edulis</i>            | Common mussel         | 22 | 2.36 |
| 100  | <i>Nannastacus unguiculatus</i>  | (cumacean)            | 7  | 2.33 |
| 101  | Nematoda spp.                    | (nematode)            | 11 | 2    |
| 102  | <i>Nereis sp.</i>                | (polychaete)          | 10 | 2    |
| 103  | <i>Odostomia plicata</i>         | (gastropod)           | 6  | 2    |
| 104  | <i>Omalogyra atomus</i>          | (gastropod)           | 10 | 2    |
| 105  | <i>Onoba semicosta</i>           | (gastropod)           | 11 | 2.25 |
| 106  | <i>Ophiothrix fragilis</i>       | Common brittle star   | 13 | 2    |
| 107  | <i>Ophiura ophiura</i>           | Serpent star          | 32 | 2.88 |
| 108  | <i>Ostracod A</i>                | (ostracod)            | 11 | 2    |
| 109  | <i>Ostracod B</i>                | (ostracod)            | 11 | 2    |
| 110  | <i>Ostracod C</i>                | (ostracod)            | 11 | 2    |
| 111  | <i>Paradoxostoma variabile</i>   | (ostracod)            | 11 | 2    |
| 112  | <i>Parvicardium exiguum</i>      | (bivalve)             | 14 | 2    |
| 113  | <i>Parvicardium ovale</i>        | (bivalve)             | 14 | 2    |
| 114  | <i>Parvicardium scabrum</i>      | (bivalve)             | 14 | 2    |
| 115  | <i>Perinereis cultrifera</i>     | (polychaete)          | 9  | 2    |
| 116  | <i>Phyllodocidae sp.</i>         | (polychaete)          | 6  | 2    |
| 117  | <i>Pilumnus hirtellus</i>        | Hairy crab            | 36 | 3.08 |
| 118  | <i>Platynereis dumerilii</i>     | (polychaete)          | 10 | 2    |
| 119  | <i>Podocoryne borealis</i>       | (hydrozoa)            | 9  | 2.50 |
| 120  | <i>Pomatoceros lamarcki</i>      | (serpulid polychaete) | 12 | 2    |
| 121  | <i>Pomatoceros triqueter</i>     | (serpulid polychaete) | 12 | 2    |
| 122  | <i>Pontocypris mytiloides</i>    | (ostracod)            | 11 | 2    |
| 123  | <i>Pseudoparatanaïs batei</i>    | (tanaid)              | 6  | 2    |
| 124  | <i>Retusa truncatula</i>         | (gastropod)           | 7  | 2    |
| 125  | <i>Rissoa parva</i>              | (gastropod)           | 15 | 2.40 |
| 126  | <i>Rissoa sarsi</i>              | (gastropod)           | 15 | 2.40 |
| 127  | <i>Rissoella diaphana</i>        | (gastropod)           | 15 | 2    |
| 128  | <i>Rissoella opalina</i>         | (gastropod)           | 15 | 2    |
| 129  | <i>Sabella pavonina</i>          | (sabellid)            | 11 | 2    |





Table S2. Length–weight (L–W) relationships used to estimate body size of all taxa identified in the experiment

| Taxa                              | L–W Relationship      | r <sup>2</sup> |
|-----------------------------------|-----------------------|----------------|
| <i>Carcinus maenas</i>            | $y=0.2668x^{2.9545}$  | 0.9693         |
| <i>Ctenolabrus rupestris</i>      | $y=0.0057x^{3.181}$   | 0.9734         |
| <i>Gaidropsarus mediterraneus</i> | $y=0.0008x^{3.3972}$  | 0.9847         |
| <i>Gobius niger</i>               | $y=0.0074x^{3.0788}$  | 0.9320         |
| <i>Gobius paganellus</i>          | $y=0.0014x^{3.4672}$  | 0.9356         |
| <i>Marthasterias glacialis</i>    | $y=0.3088x^{2.7417}$  | 0.9187         |
| <i>Necora puber</i>               | $y=0.2989x^{2.9639}$  | 0.9204         |
| <i>Palaemon serratus</i>          | $y=0.0014x^{3.3838}$  | 0.9201         |
| <i>Paracentrotus lividus</i>      | $y=1.2774x^{2.737}$   | 0.9398         |
| <i>Taurulus bubalis</i>           | $y=0.0032x^{3.3258}$  | 0.9604         |
| <i>Gobiusculus flavescens</i>     | $y=0.0004x^{3.7234}$  | 0.9612         |
| <i>Pomatoschistus pictus</i>      | $y=0.0039x^{3.1954}$  | 0.9733         |
| <i>Alvania</i> spp.               | $y=0.1391x^{2.71}$    | 0.9877         |
| <i>Anomia ephippium</i>           | $y=0.0304x^{2.9244}$  | 0.9428         |
| <i>Aora gracilis</i>              | $y=0.0018x^{3.2994}$  | 0.9202         |
| Aoridae                           | $y=0.0031x^{2.8427}$  | 0.9596         |
| <i>Ascidia aspersa</i>            | $y=0.1159x^{2.3628}$  | 0.8922         |
| <i>Bittium reticulatum</i>        | $y=0.1224x^{2.3117}$  | 0.9831         |
| <i>Buccinum undatum</i>           | $y=0.0958x^{3.0601}$  | 0.9804         |
| Cardiidae                         | $y=0.1084x^{3.0951}$  | 0.9870         |
| <i>Chlamys varia</i>              | $y=0.0508x^{3.036}$   | 0.9893         |
| <i>Clathrina coriacea</i>         | $y=0.2909x^{1.9999}$  | 0.9541         |
| <i>Crassikorophium</i> spp.       | $y=0.0046x^{3.1972}$  | 0.9491         |
| Cumacea                           | $y=0.0101x^{1.9552}$  | 0.8806         |
| <i>Dysidea fragilis</i>           | $y=0.1435x^{1.9328}$  | 0.8442         |
| <i>Epilepton clarkiae</i>         | $y=0.0959x^{2.8774}$  | 0.9805         |
| Foraminifera                      | $y=0.1598x^{3.2349}$  | 0.9801         |
| <i>Galathea squamifera</i>        | $y=0.0284x^{4.3903}$  | 0.9353         |
| <i>Hiatella arctica</i>           | $y=0.053x^{2.9161}$   | 0.9540         |
| <i>Janua pagenstecheri</i>        | $y=0.1117x^{3.0229}$  | 0.9314         |
| <i>Lembos websteri</i>            | $y=0.0037x^{2.6724}$  | 0.9806         |
| <i>Lysianassa ceratina</i>        | $y=0.0096x^{3.0979}$  | 0.9877         |
| Melitidae                         | $y=0.004x^{3.095}$    | 0.9598         |
| <i>Microdeutopus anomalus</i>     | $y=0.0016x^{3.3615}$  | 0.9685         |
| <i>Musculus discors</i>           | $y=0.0986x^{2.7968}$  | 0.9766         |
| Mysidae                           | $y=0.0006x^{3.2529}$  | 0.9236         |
| Nudibranchia                      | $y=0.0096x^{2.8116}$  | 0.9726         |
| <i>Ophiothrix fragilis</i>        | $y=0.4875x^{2.9185}$  | 0.9435         |
| <i>Ophiura ophiura</i>            | $y=0.2936x^{2.5329}$  | 0.9603         |
| Ostracoda                         | $y=0.1738x^{4.2678}$  | 0.7896         |
| <i>Parvicardium exiguum</i>       | $y=0.1104x^{3.0932}$  | 0.9786         |
| <i>Parvicardium ovale</i>         | $y=0.1018x^{3.1784}$  | 0.9900         |
| <i>Parvicardium scabrum</i>       | $y=0.1103x^{3.0607}$  | 0.9870         |
| Pectinidae                        | $y=0.0698x^{2.8284}$  | 0.9871         |
| <i>Perinereis cultrifera</i>      | $y=0.0015x^{3.0023}$  | 0.9733         |
| <i>Pilumnus hirtellus</i>         | $y=0.1324x^{2.963}$   | 0.9438         |
| <i>Platynereis dumerilii</i>      | $y=0.0113x^{2.2781}$  | 0.8051         |
| Polychaeta                        | $y=0.0021x^{2.395}$   | 0.8612         |
| <i>Pomatoceros</i> spp.           | $y=0.0029x^{2.781}$   | 0.9688         |
| <i>Rissoa</i> spp.                | $y=0.1532x^{2.3992}$  | 0.9691         |
| <i>Scrupocellaria</i> spp.        | $y=0.00004x^{2.6928}$ | 0.9691         |
| <i>Tubulipora liliacea</i>        | $y=0.0504x^{2.5072}$  | 0.9272         |

For taxa with no L–W relationship, we identified the closest taxa in terms of body shape and used that L–W relationship as a substitute. Weight (y) is measured in mg. Length (x) is measured in mm.
